# Supplementary material for: Reduction free room temperature synthesis of a durable and efficient Pd/ordered mesoporous carbon composite electrocatalyst for alkaline direct alcohols fuel cell
Source: Royal Society of Chemistry journal article supplement (doi:10.1039/c3ra42652a), 2013-10-11
Supplement: c3ra42652a.pdf [file c3ra42652a.pdf]

Supporting information:

**Reduction free room temperature synthesis of a durable and efficient Pd/ordered mesoporous carbon composite electrocatalyst for alkaline direct alcohols fuel cell**

*Guangzhi Hu<sup>1</sup>, Florian Nitzte<sup>1</sup>, Xueen Jia<sup>1</sup>, Tiva Sharifi<sup>1</sup>, Hamid Reza Barzegar<sup>1</sup>, Eduardo Gracia-Espino<sup>1,2</sup>, and Thomas Wågberg<sup>1\*</sup>*

<sup>1</sup>*Department of Physics, Umeå University, S-901 87 Umeå, Sweden.*

<sup>2</sup>*Department of Chemistry, Umeå University, 901 87 Umeå, Sweden*

[\*] Associate Prof. Thomas Wågberg, Department of Physics

Umeå University, 901 87 Umeå, Sweden, E-mail: ([Thomas.wagberg@physics.umu.se](mailto:Thomas.wagberg@physics.umu.se))

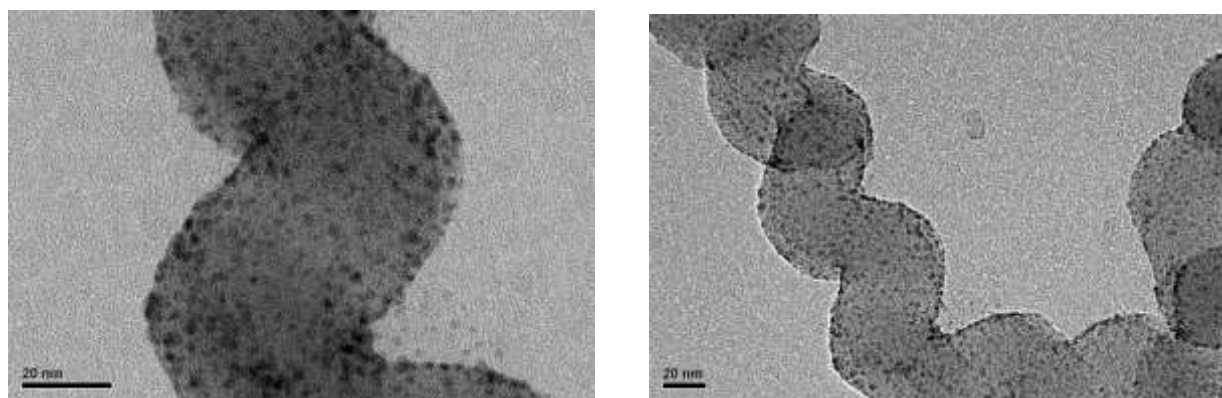

**Figure S1. Pd-decorated helical carbon nanofibers.**

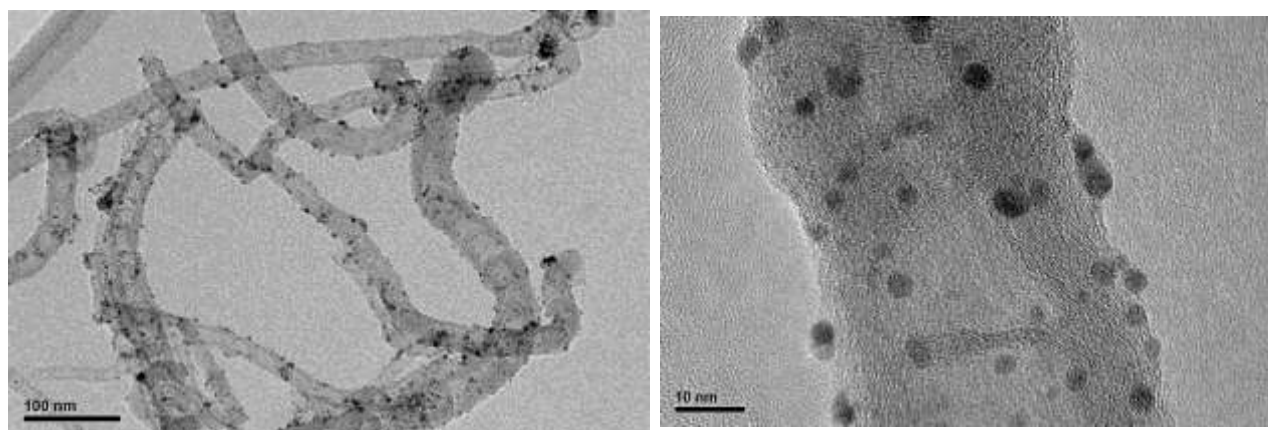

**Figure S2. Pd-decorated nitrogen doped multi-walled carbon nanotubes.**

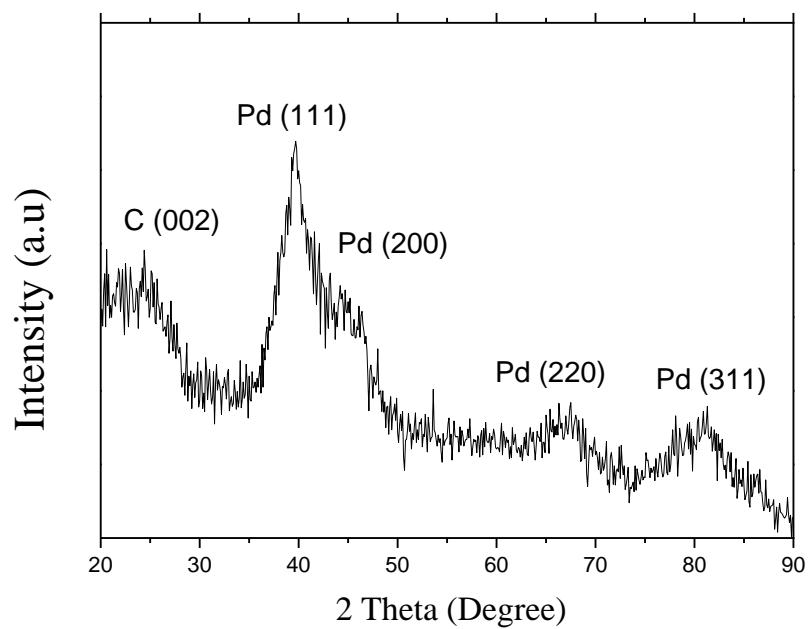

**Figure S3. Pd-decorated ordered mesoporous carbon.**
